# Supplementary material for: Koala immunogenetics and chlamydial strain type are more directly involved in chlamydial disease progression in koalas from two south east Queensland koala populations than koala retrovirus subtypes
Source: PubMed Central journal article supplement (PMC7490398; doi:10.1038/s41598-020-72050-2), 2020-09-14
Supplement: 41598_2020_72050_MOESM2_ESM.pdf [file 41598_2020_72050_MOESM2_ESM.pdf]

# Koala immunogenetics and chlamydial strain type are more directly involved in chlamydial disease progression in koalas from two south east Queensland koala populations than koala retrovirus subtypes

Amy Robbins<sup>1,2</sup>, Jonathan Hanger<sup>2</sup>, Martina Jelocnik<sup>1</sup>, Bonnie L. Quigley<sup>1</sup>, Peter Timms<sup>1\*</sup>

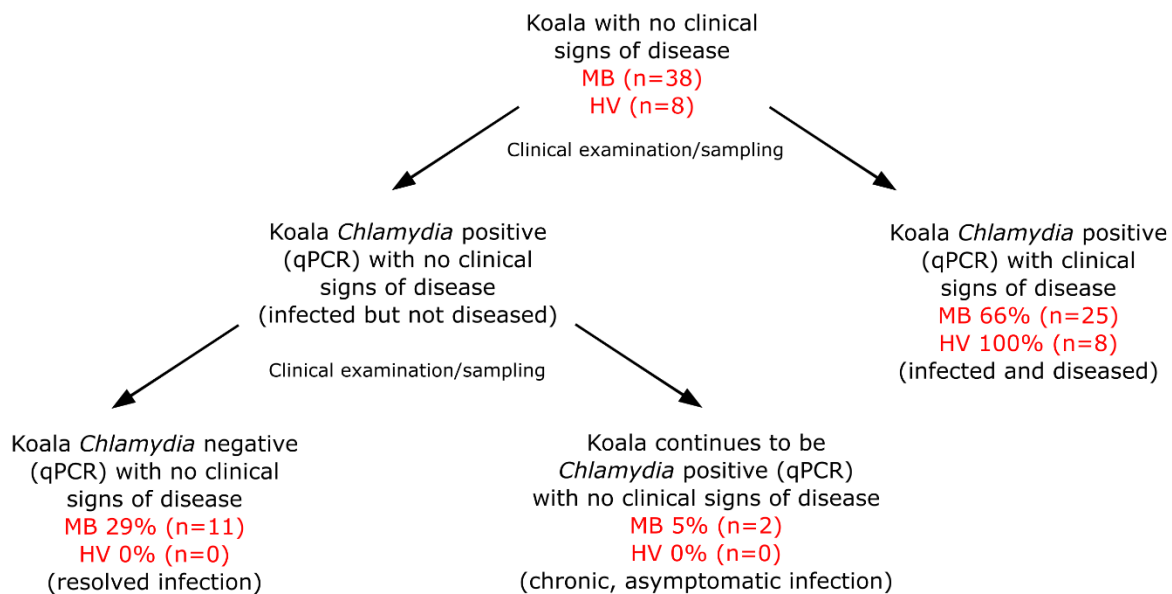

Supplementary Figure S1: A comparison of the outcomes of new chlamydial infections at the Moreton Bay site (MB) and the Old Hidden Vale site (HV)

a

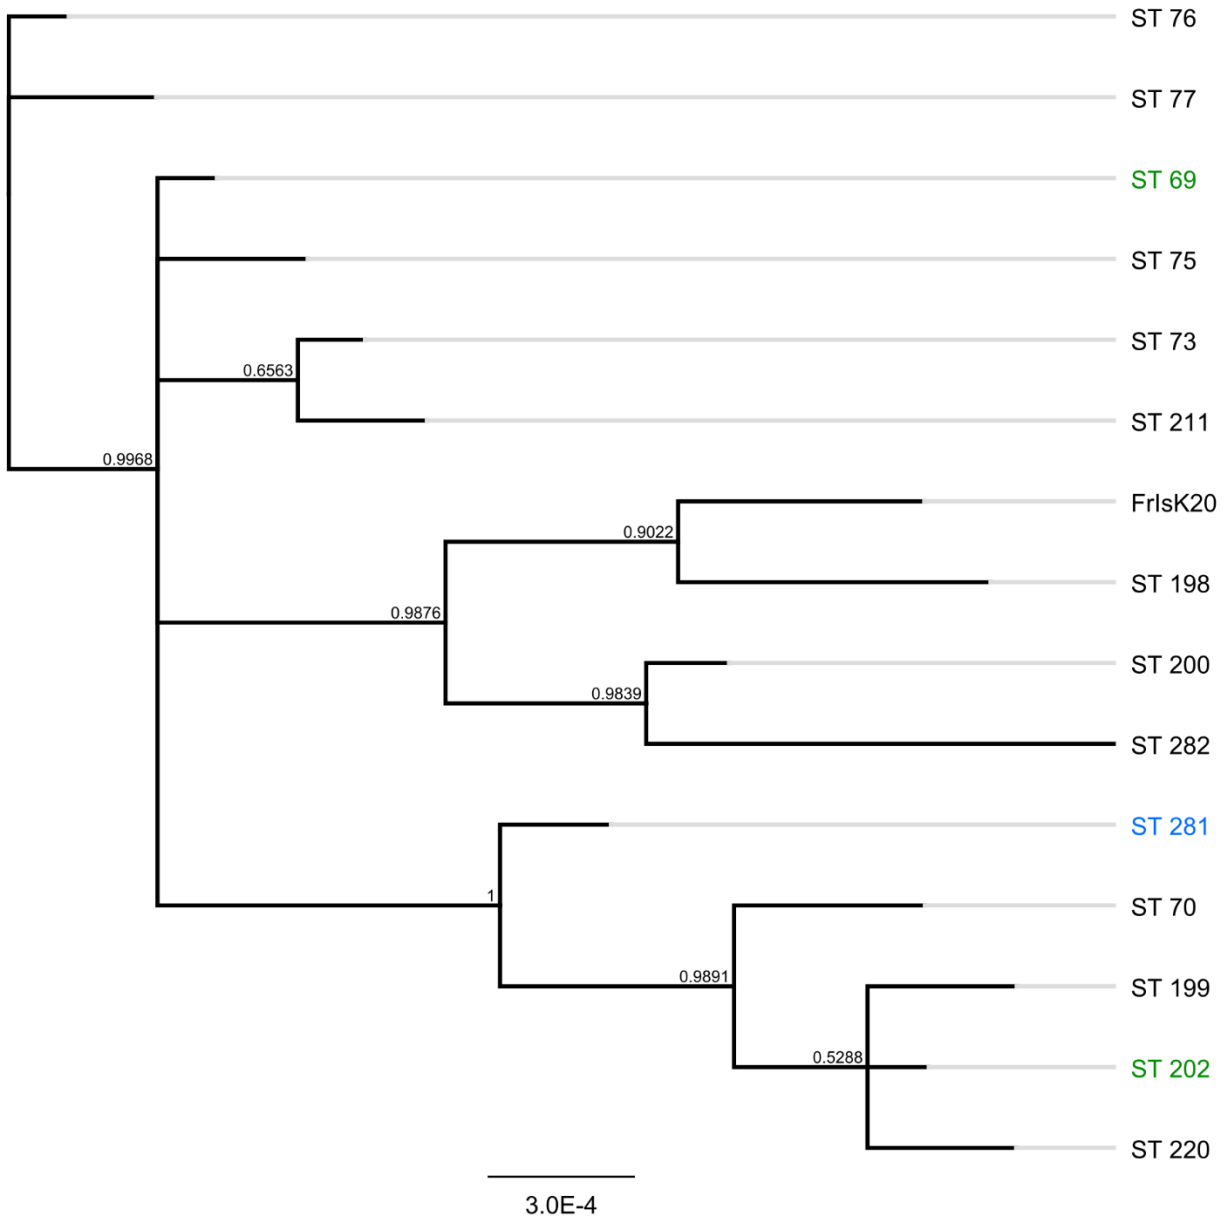

**b**

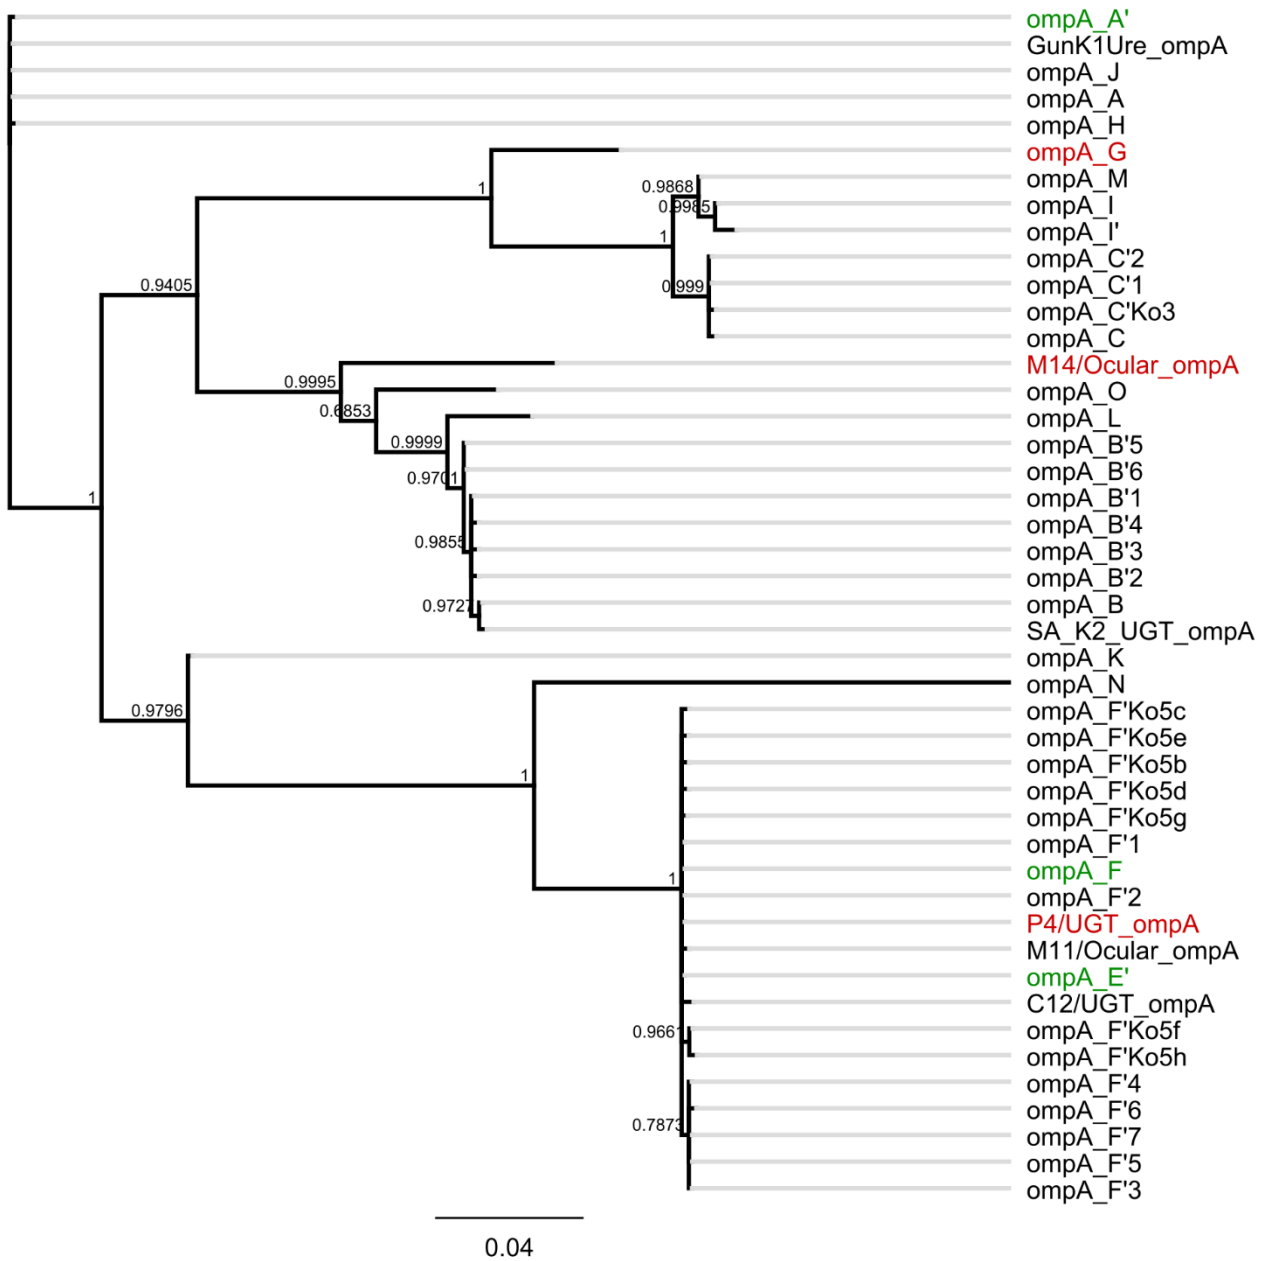

Supplementary Figure S2: Mid-point rooted Bayesian phylogenetic trees of a. Multi-Locus Sequence Typing scheme sequence types (ST) and b. *ompA* genotypes detected in koalas, indicating the sequences that were detected in this study (red denotes Moreton Bay site (MB) only, blue denotes Old Hidden Vale site (HV) only, green denotes both study sites)

a

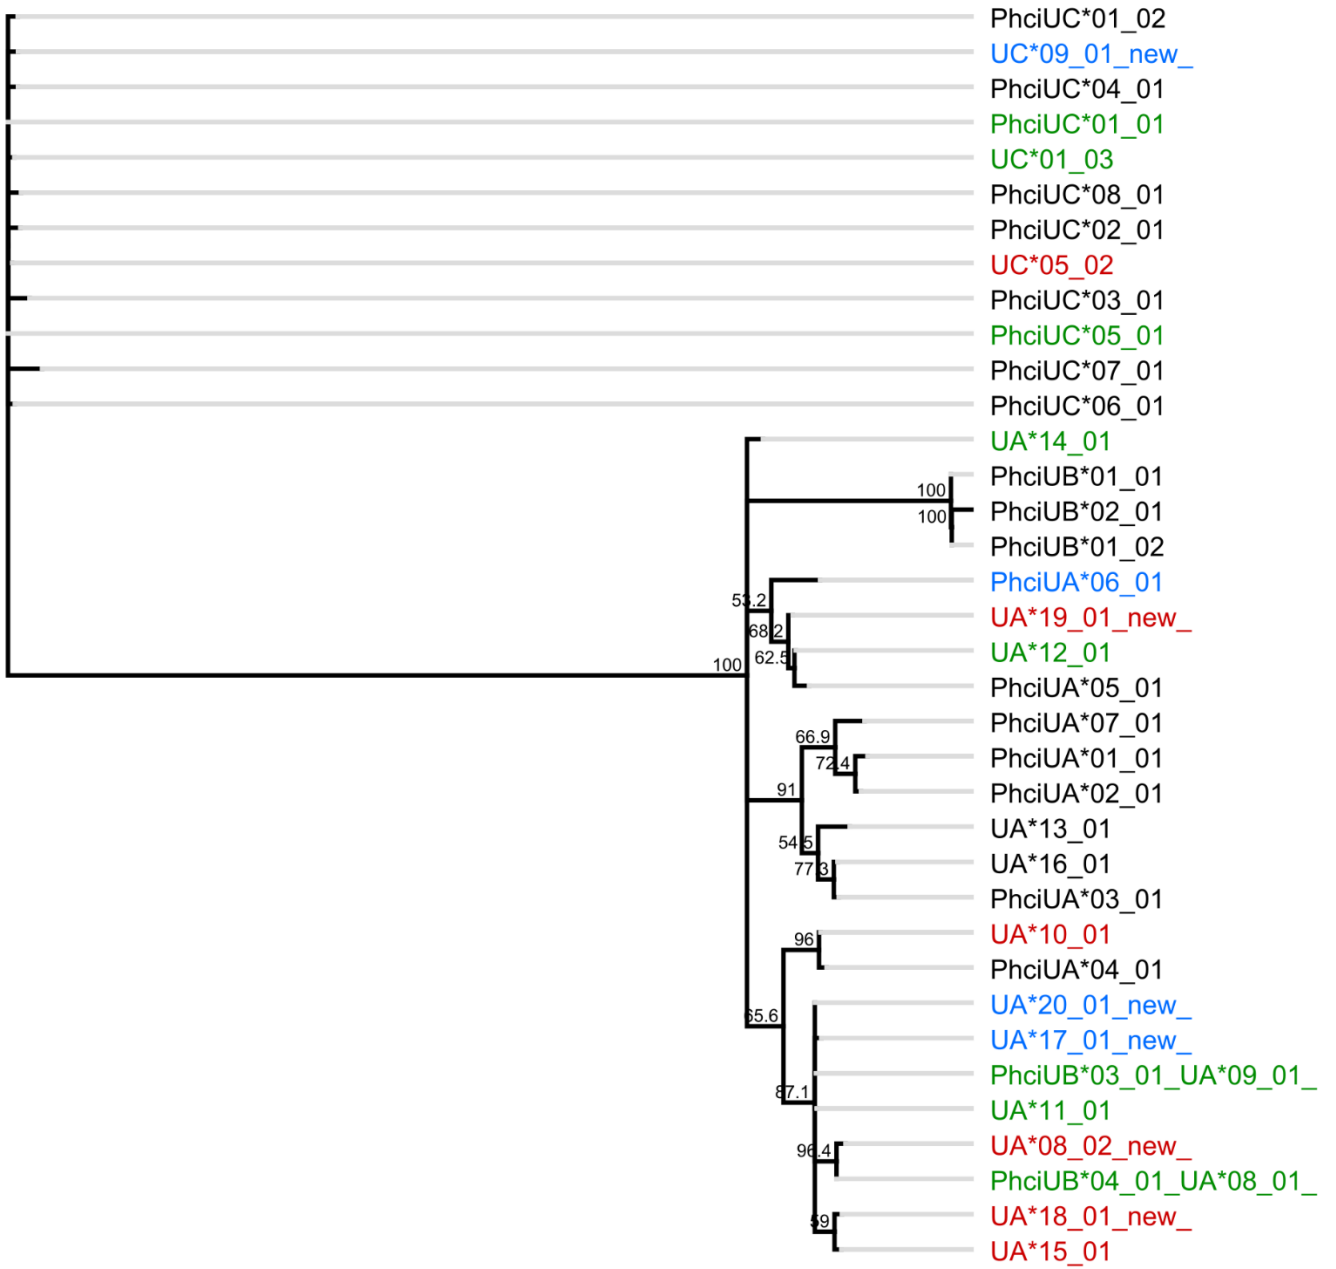

**b**

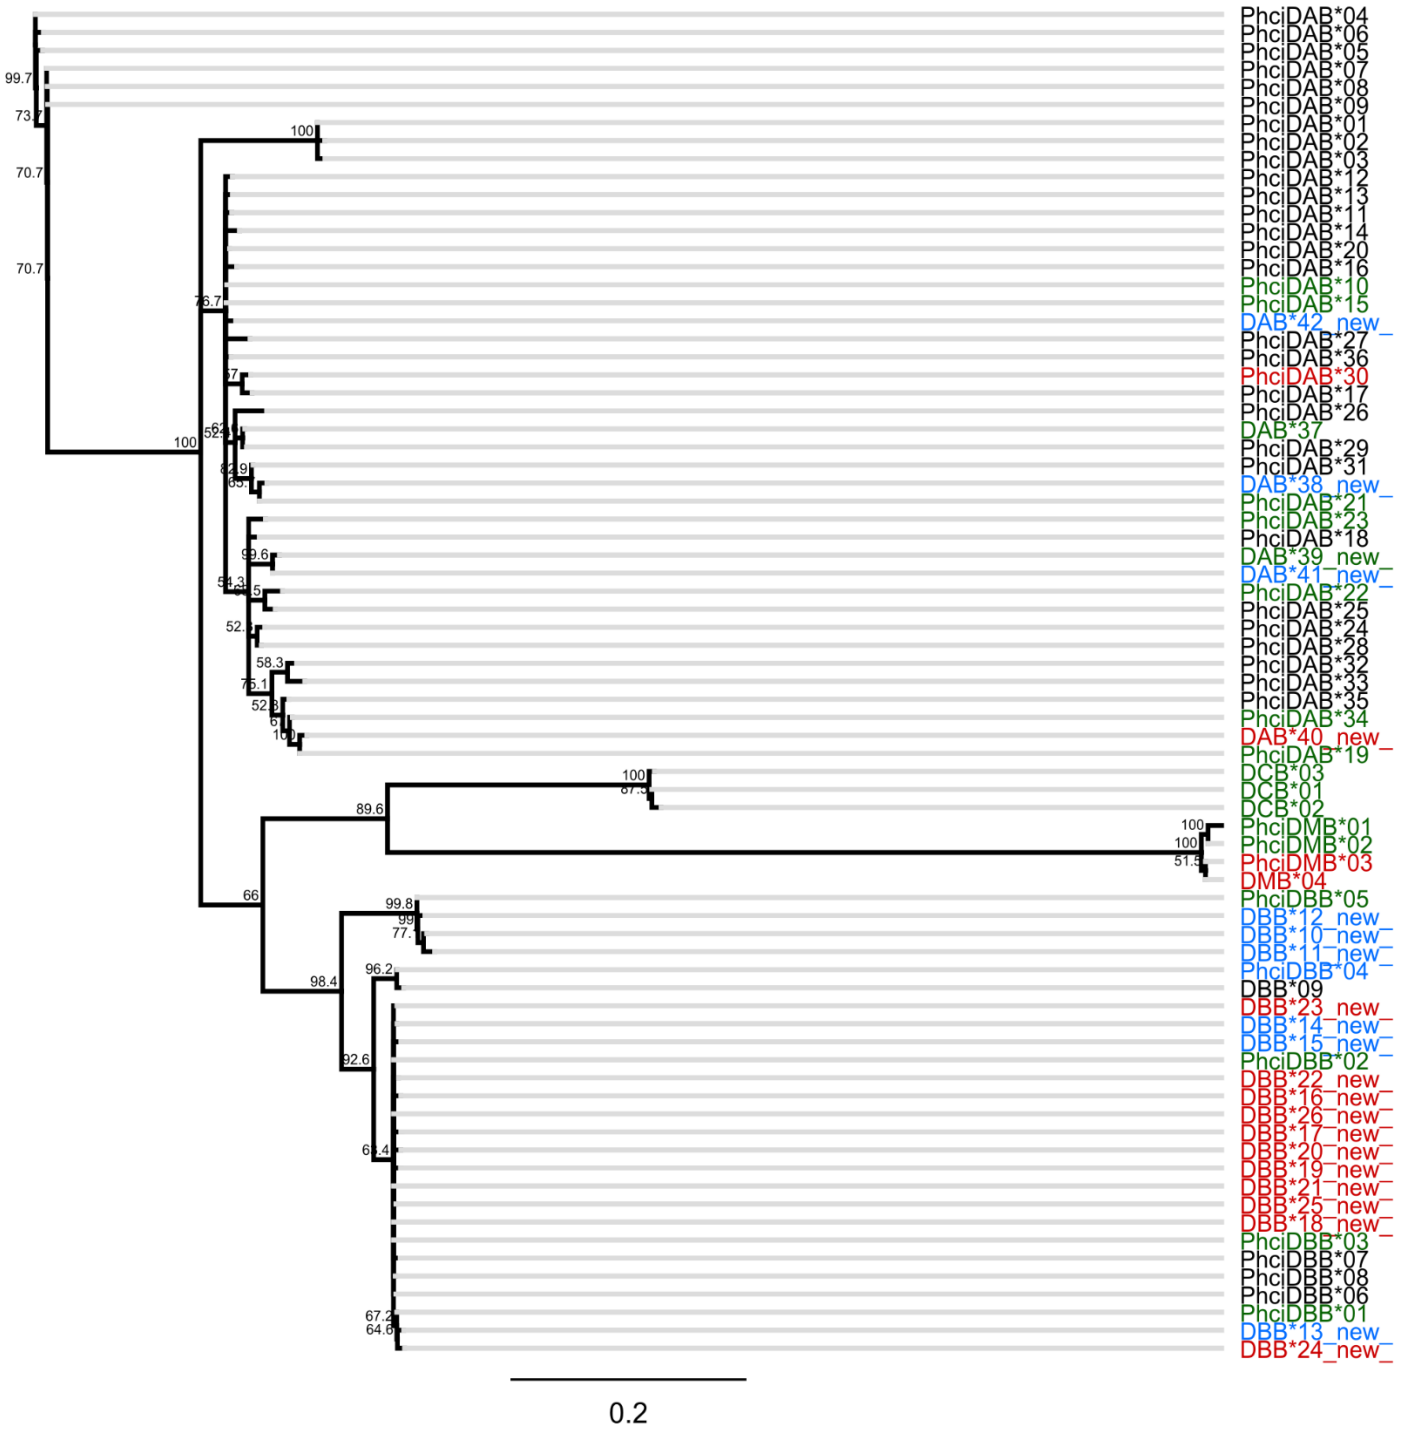

Supplementary Figure S3: Mid-point rooted Neighbour-joining phylogenetic trees of a. Class I and b. Class II major histocompatibility complex alleles indicating novel alleles identified in this study and the distribution of alleles between the Moreton Bay site (MB) and the Old Hidden Vale site (HV) (red denotes Moreton Bay site only, blue denotes Old Hidden Vale site only, green denotes both study sites)

Supplementary Table S1: The prevalence of major histocompatibility complex (MHC) alleles at the Moreton Bay site (MB) and the Old Hidden Vale site (HV) that were significantly different between the study sites

| <b>MHC allele</b> | <b>Moreton Bay site<br/>(MB)</b> | <b>Old Hidden Vale site<br/>(HV)</b> | <b>Fisher's exact test<br/>significance</b> |
|-------------------|----------------------------------|--------------------------------------|---------------------------------------------|
| <i>UA 08:01</i>   | 52% (31/60)                      | 90% (18/20)                          | $p=0.003$                                   |
| <i>UA 10:01</i>   | 45% (27/60)                      | 0% (0/20)                            | $p<0.001$                                   |
| <i>UA 11:01</i>   | 10% (6/60)                       | 45% (9/20)                           | $p=0.001$                                   |
| <i>UA 14:01</i>   | 32% (19/60)                      | 5% (1/20)                            | $p=0.017$                                   |
| <i>UA 17:01</i>   | 0% (0/60)                        | 15% (3/20)                           | $p=0.014$                                   |
| <i>UC 01:01</i>   | 100% (60/60)                     | 80% (16/20)                          | $p=0.003$                                   |
| <i>UC 01:03</i>   | 8% (5/60)                        | 30% (6/20)                           | $p=0.024$                                   |
| <i>UC 05:02</i>   | 30% (18/60)                      | 0% (0/20)                            | $p=0.004$                                   |
| <i>DAb 10</i>     | 35% (21/60)                      | 5% (1/20)                            | $p=0.009$                                   |
| <i>DAb 19</i>     | 88% (53/60)                      | 60% (12/20)                          | $p=0.009$                                   |
| <i>DAb 22</i>     | 2% (1/60)                        | 15% (3/20)                           | $p=0.046$                                   |
| <i>DAb 23</i>     | 2% (1/60)                        | 20% (4/20)                           | $p=0.013$                                   |
| <i>DAb 37</i>     | 2% (1/60)                        | 20% (4/20)                           | $p=0.013$                                   |
| <i>DBb 03</i>     | 53% (32/60)                      | 15% (3/20)                           | $p=0.004$                                   |
| <i>DBb 04</i>     | 0% (0/60)                        | 20% (4/20)                           | $p=0.003$                                   |
| <i>DMb 04</i>     | 25% (15/60)                      | 0% (0/20)                            | $p=0.017$                                   |

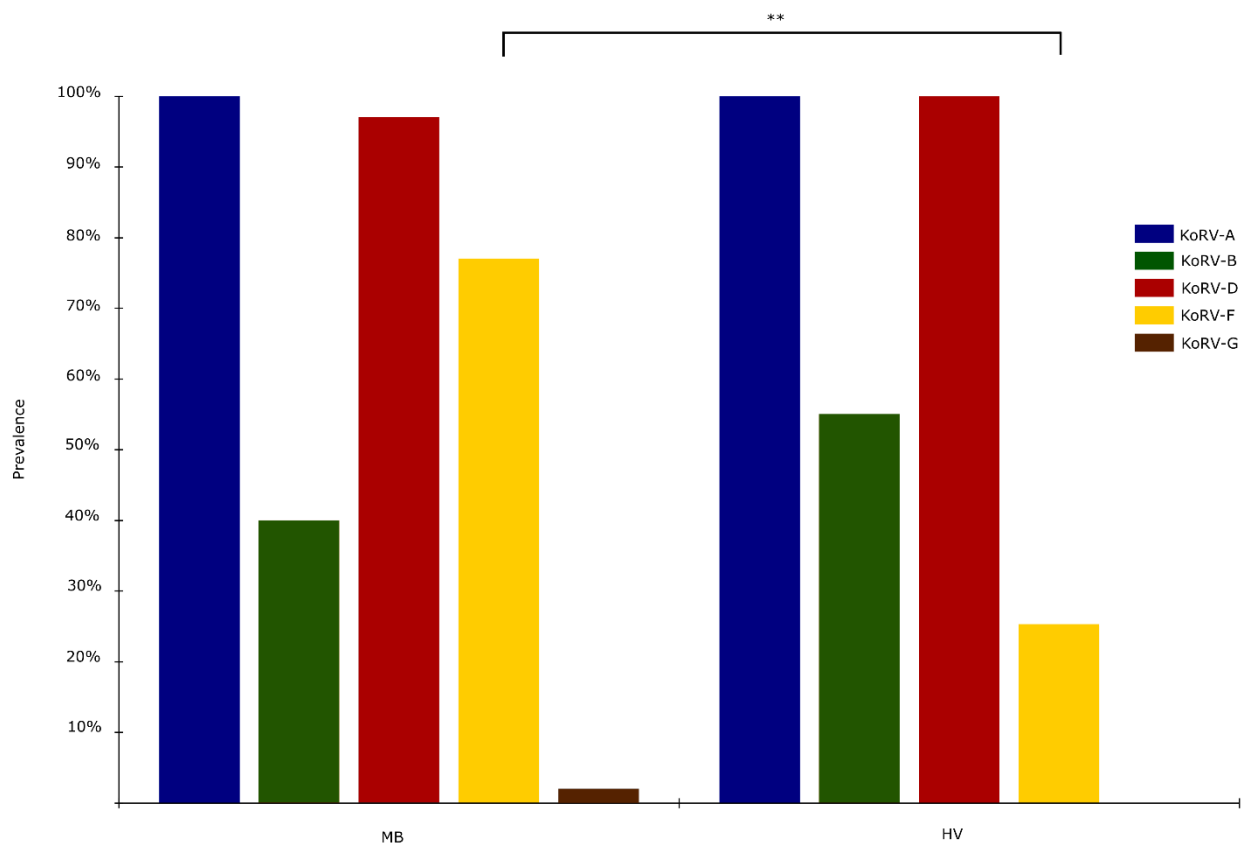

Supplementary Figure S4: A comparison of the prevalence of KoRV subtypes between the Moreton Bay site (MB) and the Old Hidden Vale site (HV), Fisher's exact test  $**p < 0.001$
